# Supplementary material for: Barriers and facilitators to utilizing digital health technologies by healthcare professionals
Source: Springer Nature journal article supplement (doi:10.1038/s41746-023-00899-4), 2023-09-18
Supplement: MOESM1 [file 41746_2023_899_MOESM1_ESM.pdf]

## Table of Contents

|                                                                                                                                           |           |
|-------------------------------------------------------------------------------------------------------------------------------------------|-----------|
| <u>SUPPLEMENTARY INFORMATION 1– LIST OF EXCLUDED REVIEWS WITH JUSTIFICATION .....</u>                                                     | <u>2</u>  |
| <u>SUPPLEMENTARY INFORMATION 2 – LIST OF BARRIERS AND FACILITATORS CATEGORIZED IN<br/>THE REVIEW.....</u>                                 | <u>8</u>  |
| <u>SUPPLEMENTARY INFORMATION 3. FIGURE LEGEND AND EXPLANATION OF POTENTIAL<br/>CONNECTIONS/RELATIONSHIPS OF IDENTIFIED BARRIERS .....</u> | <u>9</u>  |
| <u>SUPPLEMENTARY INFORMATION 4 – PROTOCOL REGISTERED ON PROSPERO .....</u>                                                                | <u>10</u> |
| <u>SUPPLEMENTARY INFORMATION 5 – SEARCH STRATEGIES .....</u>                                                                              | <u>21</u> |

## Supplementary Information 1– List of excluded reviews with justification

|    | Title                                                                                                                                                                                                      | Authors                    | Published Year | Journal                                                                                                                    | Exclusion reason |
|----|------------------------------------------------------------------------------------------------------------------------------------------------------------------------------------------------------------|----------------------------|----------------|----------------------------------------------------------------------------------------------------------------------------|------------------|
| 1  | The use and impact of mHealth by community health workers in developing and least developed countries: a systematic review                                                                                 | Abreu et al                | 2021           | Res. Biomed. Eng.                                                                                                          | 3                |
| 2  | Barriers for adopting electronic health records (EHRs) by physicians                                                                                                                                       | Ajami et al                | 2013           | Acta Informatica Medica                                                                                                    | 4                |
| 3  | The impact of artificial intelligence on radiography as a profession: A narrative review                                                                                                                   | Al-Naser et al             | 2022           | Journal of medical imaging and radiation sciences                                                                          | 4                |
| 4  | Telemedicine and its impact on rural health care in times of COVID-19: A systematic review                                                                                                                 | Albornoz-Chauca et al      | 2022           | Boletin de Malariologia y Salud Ambiental                                                                                  | 2                |
| 5  | Effectiveness and Process Evaluation of Using Digital Health Technologies in Pharmaceutical Care in Low- and Middle-Income Countries: A Systematic Review of Quantitative and Qualitative Studies          | Alfian et al               | 2023           | Telemedicine journal and e-health : the official journal of the American Telemedicine Association                          | 2                |
| 6  | The effect of wellbeing mobile-applications on the mental and physical health of healthcare workers: A systematic review                                                                                   | Alford et al               | 2021           | BJS Open                                                                                                                   | 4                |
| 7  | Blockchain Technology Effects on Healthcare Systems Using the IoT                                                                                                                                          | Ajljabri et al             | 2023           | Intelligent Internet of Things for Smart Healthcare Systems                                                                | 2                |
| 8  | A Systematic Review on Application of Data Mining Techniques in Healthcare Analytics and Data-Driven Decisions                                                                                             | Alloghani et al            | 2022           | Studies in Computational Intelligence                                                                                      | 3                |
| 9  | An exploration of factors influencing health managers' acceptance of eHealth services in the Kingdom of Saudi Arabia                                                                                       | Alshahrani et al           | 2019           | International Journal of Pharmacy Practice                                                                                 | 4                |
| 10 | Implementation strategies for telemental health: a systematic review                                                                                                                                       | Appleton et al             | 2023           | BMC health services research                                                                                               | 4                |
| 11 | Computer-generated reminders delivered on paper to healthcare professionals: Effects on professional practice and healthcare outcomes                                                                      | Arditi et al               | 2017           | The Cochrane Database of Systematic Reviews                                                                                | 2                |
| 12 | The Efficacy of Digital Health Interventions for People with Traumatic Brain Injuries and their Carers: A Systematic Review                                                                                | Avramovic et al            | 2022           | Brain injury                                                                                                               | 4                |
| 13 | A review of success/failure factors influencing healthcare personnel for telerehabilitation                                                                                                                | Bahari et al               | 2019           | 6th International Conference on Research and Innovation in Information Systems: Empowering Digital Innovation, ICRIIS 2019 | 4                |
| 14 | Barriers and facilitators to the availability of efficacious self-directed digital health tools for adults living with cancer and their caregivers: A systematic literature review and author survey study | Bamgboje-Ayodele et al     | 2021           | Patient education and counseling                                                                                           | 1                |
| 15 | Benefits, drawbacks and challenges of social media use in Dermatology: a systematic review                                                                                                                 | Barrutia et al             | 2022           | Journal of Dermatological treatment                                                                                        | 2                |
| 16 | Telework and Worker Health and Well-Being: A Review and Recommendations for Research and Practice                                                                                                          | Beckel et al               | 2022           | International journal of environmental research and public health                                                          | 4                |
| 17 | The use of social media in pharmacy practice and education                                                                                                                                                 | Benetoli et al             | 2015           | Research in social & administrative pharmacy : RSAP                                                                        | 3                |
| 18 | Safety and effectiveness of telementoring in surgery: a systematic review                                                                                                                                  | Bilgic et al               | 2016           | CMAJ. Canadian Medical Association Journal                                                                                 | 4                |
| 19 | Benchmark datasets driving artificial intelligence development fail to capture the needs of medical professionals                                                                                          | Blagec et al               | 2023           | Journal of biomedical informatics                                                                                          | 4                |
| 20 | The effect of Electronic Health Records on the medical professional identity of physicians: A systematic literature review                                                                                 | Boonstra et al             | 2021           | Procedia Computer Science                                                                                                  | 2                |
| 21 | mHealth interventions to reduce maternal and child mortality in Sub-Saharan Africa and Southern Asia: A systematic literature review                                                                       | Bossmann et al             | 2022           | Frontiers in global women's health                                                                                         | 3                |
| 22 | Creation of evidence-based resources to support pediatric healthcare professionals in adapting practices to include telehealth                                                                             | Boychuck et al             | 2021           | Developmental Medicine and Child Neurology                                                                                 | 4                |
| 23 | What unique knowledge and experiences do healthcare professionals have working in clinical informatics?                                                                                                    | Brouat et al               | 2022           | Informatics in medicine unlocked                                                                                           | 4                |
| 24 | Health care students experience of using digital technology in patient care: A scoping review of the literature                                                                                            | Brown Wilson et al         | 2020           | Nurse education today                                                                                                      | 3                |
| 25 | Artificial Intelligence for the Otolaryngologist: A State of the Art Review                                                                                                                                | Bur et al                  | 2019           | Otolaryngology - Head and Neck Surgery (United States)                                                                     | 4                |
| 26 | The effectiveness of teleconsultations in primary care: systematic review                                                                                                                                  | Carrillo de Albornoz et al | 2022           | Family practice                                                                                                            | 3                |
| 27 | Telehealth as state response strategy: Systematic review                                                                                                                                                   | Celes et al                | 2018           | Rev. Panam. Salud Publica Pan Am. J. Public Health                                                                         | 3                |
| 28 | PNS42 Health Care Professionals and Mobile Applications: A Systematic Review                                                                                                                               | Chandran et al             | 2020           | Value in Health Regional Issues                                                                                            | 2                |
| 29 | Computerised decision support systems for healthcare professionals: an interpretative review                                                                                                               | Cresswell et al            | 2012           | Inform in Prim Care                                                                                                        | 2                |

|    |                                                                                                                                                                                                   |                    |      |                                                                             |   |
|----|---------------------------------------------------------------------------------------------------------------------------------------------------------------------------------------------------|--------------------|------|-----------------------------------------------------------------------------|---|
| 30 | A systematic review of randomized controlled trials of telehealth and digital technology use by community pharmacists to improve public health                                                    | Crilly et al       | 2020 | Pharmacy                                                                    | 3 |
| 31 | Telemedicine versus face to face patient care: effects on professional practice and health care outcomes                                                                                          | Currell et al      | 2000 | The Cochrane database of systematic reviews                                 | 3 |
| 32 | Computer-aided anatomy recognition in intrathoracic and abdominal surgery: a systematic review                                                                                                    | denBoer 2022       | 2022 | Surgical Endoscopy                                                          | 2 |
| 33 | Using Machine Learning to Assess Physician Competence: A Systematic Review                                                                                                                        | Dias et al         | 2019 | Academic medicine : journal of the Association of American Medical Colleges | 3 |
| 34 | Scoping review of pharmacist involvement using telehealth in transitions of care                                                                                                                  | Dixon et al        | 2017 | Journal of the American Pharmacists Association                             | 4 |
| 35 | Telephone consultations for general practice: A systematic review                                                                                                                                 | Downes et al       | 2017 | Systematic Reviews                                                          | 3 |
| 36 | Potential of Internet of Medical Things (IoMT) applications in building a smart healthcare system: A systematic review                                                                            | Dwivedi et al      | 2022 | Journal of oral biology and craniofacial research                           | 3 |
| 37 | Who's using PDAs? Estimates of PDA use by health care providers: A systematic review of surveys                                                                                                   | El Emam et al      | 2006 | Journal of Medical Internet Research                                        | 4 |
| 38 | The effectiveness of tele-triage during the COVID-19 pandemic: A systematic review and narrative synthesis                                                                                        | Farzandipour et al | 2023 | Journal of telemedicine and telecare                                        | 3 |
| 39 | Hand hygiene teaching technologies for the healthcare team and caregivers: systematic review                                                                                                      | Fernandes et al    | 2022 | Bone marrow transplantation                                                 | 2 |
| 40 | Exploring digital health interventions to support community health workers in low-and-middle-income countries during the COVID-19 pandemic: A scoping review protocol                             | Feroz et al        | 2021 | BMJ Open                                                                    | 4 |
| 41 | Interventions to increase the use of electronic health information by healthcare practitioners to improve clinical practice and patient outcomes                                                  | Fiander et al      | 2015 | The Cochrane database of systematic reviews                                 | 2 |
| 42 | Using Mobile phone applications in engaging nurses for preventing healthcare-associated infections: A systematic review                                                                           | Fithriyyah et al   | 2022 | Nursing Practice today                                                      | 2 |
| 43 | Interactive telemedicine: effects on professional practice and health care outcomes                                                                                                               | Flodgren et al     | 2015 | The Cochrane database of systematic reviews                                 | 3 |
| 44 | Efficacy of adaptive e-learning for health professionals and students: a systematic review and meta-analysis                                                                                      | Fontaine et al     | 2019 | BMJ open                                                                    | 4 |
| 45 | Nurse workarounds in the electronic health record: An integrative review                                                                                                                          | Fraczkowski et al  | 2020 | J. Am. Med. Informatics Assoc.                                              | 3 |
| 46 | The Effectiveness of Mobile-Health Technologies to Improve Health Care Service Delivery Processes: A Systematic Review and Meta-Analysis                                                          | Free et al         | 2013 | PLoS Med.                                                                   | 2 |
| 48 | Digital technologies in healthcare: What best practices and challenges?                                                                                                                           | Fusco et al        | 2021 | Portuguese Journal of Public Health                                         | 4 |
| 49 | Supporting health professionals through information and communication technologies: A systematic review of the effects of information and communication technologies on recruitment and retention | Gagnon et al       | 2011 | Telemedicine. e-Health                                                      | 2 |
| 50 | Implementation frameworks for Artificial intelligence translation into Healthcare practice: Scoping review                                                                                        | Gama et al         | 2022 | Journal of Medical Internet Research                                        | 2 |
| 51 | Telemedicine solutions for clinical care delivery during COVID-19 pandemic: A scoping review                                                                                                      | Ganjali et al      | 2022 | Frontiers in public health                                                  | 2 |
| 52 | Acceptance of telemedicine technology among Physicians: A Systematic review                                                                                                                       | Garavand et al     | 2022 | Informatics in medicine unlocked                                            | 2 |
| 53 | Implementation studies for AI based tools in Healthcare should consider clinician competencies: Negative findings from a scoping review                                                           | Garvey 2022        | 2022 | JMIR medical informatics                                                    | 2 |
| 54 | Considering Clinician competencies for the implementation of artificial intelligence - based tools in healthcare: Findings from a scoping review                                                  | Garvey 2022        | 2022 | JMIR medical informatics                                                    | 2 |
| 55 | Healthcare provider-targeted mobile applications to diagnose, screen, or monitor communicable diseases of public health importance in low- and middle-income countries: a systematic review       | Geldsetzer et al   | 2022 | medRxiv                                                                     | 4 |
| 56 | Health information technology to facilitate communication involving health care providers, caregivers, and pediatric patients: a scoping review                                                   | Gentles et al      | 2010 | Journal of medical Internet research                                        | 3 |
| 57 | WhatsApp Messenger as an Adjunctive Tool for Telemedicine: An Overview                                                                                                                            | Giordano et al     | 2017 | Interactive journal of medical research                                     | 2 |
| 58 | Nurses' use of social media during the COVID 19 pandemic - A scoping review                                                                                                                       | Glasdam et al      | 2022 | PloS one                                                                    | 2 |
| 59 | Mobile technologies to support healthcare provider to healthcare provider communication and management of care                                                                                    | Gonçalves et al    | 2020 | The Cochrane database of systematic reviews                                 | 2 |
| 60 | Community health worker use of Smart devices for health promotion: Scoping review                                                                                                                 | Greuel et al       | 2023 | JMIR mHealth and uHealth                                                    | 2 |

|    |                                                                                                                                                                                                                   |                 |      |                                                                                           |   |
|----|-------------------------------------------------------------------------------------------------------------------------------------------------------------------------------------------------------------------|-----------------|------|-------------------------------------------------------------------------------------------|---|
| 61 | Telework-Related Stress (TERRA) as an emerging problem during the Covid-19 Pandemic: a Systematic Review                                                                                                          | Gualano et al   | 2022 | Safety and health at work                                                                 | 4 |
| 62 | Application of Virtual Reality Technology in Clinical Practice, Teaching, and Research in Complementary and Alternative Medicine                                                                                  | Guan et al      | 2022 | Evidence-based Complementary and Alternative Medicine                                     | 4 |
| 63 | Parent and provider satisfaction of telehealth in pediatric surgical subspecialty care                                                                                                                            | Gudipudi et al  | 2022 | Journal of telemedicine and telecare                                                      | 2 |
| 64 | Mobile-Social learning for continuing professional development in Low-and Middle-income countries: Integrative review                                                                                             | Guillaume et al | 2022 | JMIR medical education                                                                    | 2 |
| 65 | Systematic review of evidence for the benefits of telemedicine CORR Insights: How Satisfied Are Patients and Surgeons with Telemedicine in Orthopaedic Care During the COVID-19 Pandemic?                         | Hailey et al    | 2002 | J Telemed Telecare                                                                        | 3 |
| 66 | A Systematic Review and Meta-analysis                                                                                                                                                                             | Halai et al     | 2021 | Clinical orthopaedics and related research                                                | 2 |
| 67 | Social media use by health care professionals and trainees: A scoping review                                                                                                                                      | Hamm et al      | 2013 | Acad. Med.                                                                                | 3 |
| 68 | The Application of Artificial Intelligence for Digital Imaging in the Operating Theatre: A Systematic Review and Narrative Synthesis                                                                              | Hardacre et al  | 2022 | British Journal of Surgery                                                                | 3 |
| 69 | Machine learning to guide clinical decision-making in abdominal surgery-a systematic literature review                                                                                                            | Henn et al      | 2022 | Langenbeck's archives of surgery                                                          | 3 |
| 70 | Clinician behaviors in telehealth care delivery: a systematic review                                                                                                                                              | Henry et al     | 2017 | Adv. Health Sci. Educ.                                                                    | 3 |
| 71 | Examining the effectiveness of Web-based interventions to enhance resilience in Health care Professionals: Systematic review                                                                                      | Henshall et al  | 2022 | JMIR medical education                                                                    | 2 |
| 72 | Physician Satisfaction With Telehealth: A Systematic Review and Agenda for Future Research                                                                                                                        | Hoff et al      | 2022 | Quality management in health care                                                         | 4 |
| 73 | Effects of computer-based clinical decision support systems on physician performance and patient outcomes: a systematic review                                                                                    | Hunt et al      | 1998 | JAMA                                                                                      | 4 |
| 74 | Virtual and Augmented Reality in Neurosurgery: The Evolution of its Application and Study Designs                                                                                                                 | Jean, W. C.     | 2022 | World neurosurgery                                                                        | 3 |
| 75 | Alert fatigue and errors caused by technology: A scoping review and introduction to the flow of cognitive processing model                                                                                        | Joseph et al    | 2021 | Knowledge Management and E-Learning                                                       | 4 |
| 76 | Promoting Physical Activity and Weight Loss With mHealth Interventions Among Workers: Systematic Review and Meta-analysis of Randomized Controlled Trials                                                         | Jung et al      | 2022 | JMIR mHealth and uHealth                                                                  | 3 |
| 77 | Virtual Reality Simulation for Disaster Preparedness Training in Hospitals: Integrated Review                                                                                                                     | Jung, Y.        | 2022 | Journal of medical Internet research                                                      | 3 |
| 78 | Use of Telemedicine to Enhance Pharmacist Services in the Nursing Facility                                                                                                                                        | Kane-Gill et al | 2017 | The Consultant pharmacist : the journal of the American Society of Consultant Pharmacists | 3 |
| 79 | Evaluation criteria of the effects of Decision support integrated into computerized provider order entry system: A scoping review                                                                                 | Karajuzadeh     | 2022 | Shiraz E Medical Journal                                                                  | 2 |
| 80 | eHealth or e-Chaos: The use of Digital Health Interventions for Health Systems Strengthening in sub-Saharan Africa over the last 10 years: A scoping review                                                       | Karamagi et al  | 2022 | Journal of global health                                                                  | 4 |
| 81 | Physician leadership in e-health? A systematic literature review                                                                                                                                                  | Keijser et al   | 2016 | Leadership in health services (Bradford, England)                                         | 4 |
| 82 | Artificial Intelligence and Internet of Things (AI-IoT) Technologies in Response to COVID-19 Pandemic: A Systematic Review                                                                                        | Khan et al      | 2022 | IEEE Access                                                                               | 4 |
| 83 | Advanced Medication Reconciliation: A Systematic Review of the Impact on Medication Errors and Adverse Drug Events Associated with Transitions of Care                                                            | Killin et al    | 2021 | Joint Commission Journal on Quality and Patient Safety                                    | 3 |
| 84 | Examining mental workload relating to digital health technologies in health care: Systematic review                                                                                                               | Kremer et al    | 2022 | Journal of Medical Internet Research                                                      | 2 |
| 85 | Leadership in the context of digital health services: A concept analysis                                                                                                                                          | Laukka et al    | 2022 | Journal of nursing management                                                             | 3 |
| 86 | 3.129 The Effect of Mobile Digital Interventions on Mental Health Measures During the COVID-19 Pandemic: A Systematic Review of Controlled Studies                                                                | Lee et al       | 2022 | Journal of the American Academy of Child and Adolescent Psychiatry                        | 3 |
| 87 | Tools to assess the trustworthiness of evidence-based point-of-care information for health care professionals: Systematic review                                                                                  | Lenaerts et al  | 2020 | J. Med. Internet Res.                                                                     | 3 |
| 88 | Exploration of implementation, financial and technical considerations within allied health professional (AHP) telehealth consultation guidance: a scoping review including UK AHP professional bodies, Æ guidance | Leone et al     | 2021 | BMJ Open                                                                                  | 3 |
| 89 | How mHealth Can Contribute to Improving the Continuum of Care: A Scoping Review Approach to the Case of Human Immunodeficiency Virus in Sub-Saharan Africa                                                        | Lepere et al    | 2022 | Public health reviews                                                                     | 3 |
| 90 | Electronic medical record-related burnout in healthcare providers: A scoping review of outcomes and interventions                                                                                                 | Li et al        | 2022 | BMJ Open                                                                                  |   |

|     |                                                                                                                                                                                                            |                      |      |                                                                   |   |
|-----|------------------------------------------------------------------------------------------------------------------------------------------------------------------------------------------------------------|----------------------|------|-------------------------------------------------------------------|---|
| 91  | Digital technologies for health workforce development in Low-and middle-income countries: A Scoping review                                                                                                 | Long et al           | 2018 | Global health, science and practice                               | 2 |
| 92  | Effects of e-Health interventions on stress reduction and mental health promotion in healthcare professionals: A systematic review                                                                         | López-Del-Hoyo et al | 2023 | Journal of clinical nursing                                       | 2 |
| 93  | Mobile Applications for Caregivers of Individuals with Chronic Conditions and/or Diseases: Quantitative Content Analysis                                                                                   | Lorca-Cabrera et al  | 2021 | International journal of medical informatics                      | 3 |
| 94  | Health care professionals' experiences and perspectives on using telehealth for home-based palliative care: Protocol for a scoping review                                                                  | Lundereng et al      | 2021 | JMIR Res. Prot.                                                   | 4 |
| 95  | The effect of online health information seeking on physician-patient relationships: Systematic review                                                                                                      | Luo et al            | 2022 | Journal of Medical Internet Research                              | 2 |
| 96  | Influence of Health Social Networks on Healthcare: A Systematic Literature Review                                                                                                                          | Makena et al         | 2022 | EPIC series in computing                                          | 4 |
| 97  | Health information exchange policy and standards for digital health systems in africa: A systematic review                                                                                                 | Mamuye et al         | 2022 | PLOS digital health                                               | 4 |
| 98  | Internet of Things Adoption for Saudi Healthcare Services                                                                                                                                                  | Masmali et al        | 2021 | Pacific Asia Journal of the Association for Information Systems   | 3 |
| 99  | Digital health technologies for osteopaths and allied healthcare service providers: A scoping review                                                                                                       | Mastronardo et al    | 2021 | Int. J. Osteopath. Med.                                           | 3 |
| 100 | Scoping review: Positive and negative impact of technology on clinicians                                                                                                                                   | McBride et al        | 2023 | Nursing Outlook                                                   | 2 |
|     | Effects of computerised clinical decision support systems (CDSS) on nursing and allied health professional performance and patient outcomes: A systematic review of experimental and observational studies |                      |      |                                                                   |   |
| 101 | Lessons and Implementation Challenges of Community Health Information System in LMICs: A Scoping Review of Literature                                                                                      | Mebrahtu et al       | 2021 | BMJ Open                                                          | 2 |
| 102 | Teleconsultation in orthopaedic surgery: A systematic review and meta-analysis of patient and physician experiences                                                                                        | Mekonnen et al       | 2022 | Online journal of public health informatics                       | 4 |
| 103 | Evidence of effectiveness of health care professionals using handheld computers: A scoping review of systematic reviews                                                                                    | Melian et al         | 2022 | Journal of telemedicine and telecare                              | 3 |
| 104 | Use of handheld computers in clinical practice: a systematic review                                                                                                                                        | Mickan et al         | 2013 | J. Med. Internet Res.                                             | 2 |
| 105 | A systematic review of the impact of health information technology on nurses' time                                                                                                                         | Mickan et al         | 2014 | BMC medical informatics and decision making                       | 2 |
| 106 | Artificial intelligence and compassion in healthcare: A Systematic scoping review                                                                                                                          | Moore et al          | 2020 | Journal of the American Medical Informatics Association           | 2 |
| 107 | Experiences of patients and providers while using telemedicine in cancer care during COVID 19 pandemic: A systematic review and meta-synthesis of qualitative literature                                   | Morrow et al         | 2023 | Frontiers in Psychology                                           | 2 |
| 108 | Electronic health records and physician burnout: A scoping review                                                                                                                                          | Mostafaei et al      | 2022 | Supportive care in cancer                                         | 2 |
| 109 | Computer-based clinical decision support for general practitioners                                                                                                                                         | Muhyiaddin et al     | 2022 | Studies in health technology and informatics                      | 2 |
| 110 | Impact of industry 4.0 on healthcare systems of low- and middle-income countries: a systematic review                                                                                                      | Murphy et al         | 2014 | Family Practice                                                   | 4 |
| 111 | Health care professionals' perspectives on the secondary use of health records to improve quality and safety of care in England: Qualitative study                                                         | Mwanza et al         | 2023 | Health and technology                                             | 3 |
| 112 | Problematic problem diagnostics: Why digital health interventions for community health workers do not always achieve their desired impact                                                                  | Neves et al          | 2019 | J. Med. Internet Res.                                             | 4 |
| 113 | The use of technology for urgent clinician to clinician communications: A systematic review of the literature                                                                                              | Newton-Lewis et al   | 2021 | BMJ global health                                                 | 4 |
| 114 | Health information communication technology evaluation frameworks for pharmacist prescribing: A systematic scoping review                                                                                  | Nguyen et al         | 2015 | Int. J. Med. Informatics                                          | 4 |
| 115 | HOSPITAL MANAGERS' NEED FOR INFORMATION ON HEALTH TECHNOLOGY INVESTMENTS                                                                                                                                   | Ogundipe et al       | 2023 | Research in social & administrative pharmacy : RSAP               | 4 |
| 116 | Effect of simulation on stress, anxiety and self confidence in nursing students: Systematic review with meta-analysis and meta-regression                                                                  | Olholm et al         | 2015 | International journal of technology assessment in health care     | 2 |
| 117 | Views of nurses and other health and social care workers on the use of assistive humanoid and animal-like robots in health and social care: a scoping review                                               | Oliviera et al       | 2022 | International journal of nursing studies                          | 1 |
| 118 | Digital Health Interventions by Clinical Pharmacists: A Systematic Review                                                                                                                                  | Papadopoulos et al   | 2018 | Contemporary nurse                                                | 3 |
| 119 | Economic Evaluation of Pharmacist-Led Digital Health Interventions: A Systematic Review                                                                                                                    | Park et al           | 2022 | International Journal of Environmental Research and Public Health | 2 |
| 120 | HTA58 A Systematic Review of Digital Technology Use By Clinical Pharmacists                                                                                                                                | Park et al           | 2022 | International journal of environmental research and public health | 3 |
| 121 |                                                                                                                                                                                                            | Park et al           | 2022 | Value in Health                                                   | 4 |

|     |                                                                                                                                                                                              |                     |      |                                                                                                                                                        |   |
|-----|----------------------------------------------------------------------------------------------------------------------------------------------------------------------------------------------|---------------------|------|--------------------------------------------------------------------------------------------------------------------------------------------------------|---|
| 122 | Potential of big data for healthcare and pharmaceutical professionals skills development                                                                                                     | Pesqueira et al     | 2021 | Top 10 Challenges of Big Data Analytics                                                                                                                | 3 |
| 123 | Digital Mental Health Tools for Caregivers of Older Adults-A Scoping Review                                                                                                                  | Petrovic et al      | 2020 | Frontiers in public health                                                                                                                             | 4 |
| 124 | How does telemonitoring impact medical education within the surgical field? A scoping review                                                                                                 | Pfenning et al      | 2022 | American journal of surgery                                                                                                                            | 1 |
| 125 | The impact of mobile handheld technology on hospital physicians' work practices and patient care: a systematic review                                                                        | Prgomet et al       | 2009 | JAMIA                                                                                                                                                  | 2 |
| 126 | Applications of machine learning in routine laboratory medicine: Current state and future directions                                                                                         | Rabbani et al       | 2022 | Clinical biochemistry                                                                                                                                  | 4 |
| 127 | Cloud healthcare services: A comprehensive and systematic literature review                                                                                                                  | Rahimi et al        | 2022 | Transactions on Emerging Telecommunications Technologies                                                                                               | 3 |
| 128 | Effects of computerized decision support systems on nursing performance and patient outcomes: a systematic review                                                                            | Randell et al       | 2007 | Journal of health services research & policy                                                                                                           | 3 |
| 129 | A scoping review of applications of the Consolidated Framework for Implementation Research (CFIR) to telehealth service implementation initiatives                                           | Rangachari et al    | 2022 | BMC health services research                                                                                                                           | 3 |
| 130 | COVID-19 detection empowered with machine learning and deep learning techniques: A systematic review                                                                                         | Rehman et al        | 2021 | Appl. Sci.                                                                                                                                             | 3 |
| 131 | A systematic review and meta-analysis of online versus alternative methods for training licensed health care professionals to deliver clinical interventions                                 | Richmond et al      | 2017 | BMC Med. Educ.                                                                                                                                         | 3 |
| 132 | Interventions to support the mental health and wellbeing of front line healthcare workers in hospitals during pandemics: an evidence review and synthesis                                    | Robins-Browne et al | 2022 | BMJ Open                                                                                                                                               | 1 |
| 133 | Videoconference compared to telephone in healthcare delivery: A systematic review                                                                                                            | Rush et al          | 2018 | Int. J. Med. Informatics                                                                                                                               | 2 |
| 134 | Network approaches and interventions in healthcare settings: A systematic scoping review                                                                                                     | Saatchi et al       | 2023 | PloS one                                                                                                                                               | 3 |
| 135 | Reviews of the implications of VR/AR health care applications in terms of organizational and societal change                                                                                 | Sharif et al        | 2018 | Emerging Technologies for Health and Medicine: Virtual Reality, Augmented Reality, Artificial Intelligence, Internet of Things, Robotics, Industry 4.0 | 4 |
| 136 | Implementation of Virtual Communities of Practice in Healthcare to Improve Capability and Capacity: A 10-Year Scoping Review                                                                 | Shaw et al          | 2022 | International journal of environmental research and public health                                                                                      | 3 |
| 137 | Impact of Internet-Based Interventions on Caregiver Mental Health: Systematic Review and Meta-Analysis                                                                                       | Sherifali et al     | 2018 | Journal of medical Internet research                                                                                                                   | 4 |
| 138 | The effectiveness of internet-based e-learning on clinician behavior and patient outcomes: a systematic review protocol                                                                      | Sinclair et al      | 2015 | Journal of medical Internet research                                                                                                                   | 3 |
| 139 | Determining if Telehealth Can Reduce Health System Costs: Scoping Review                                                                                                                     | Snoswell et al      | 2020 | Journal of medical Internet research                                                                                                                   | 2 |
| 140 | The Effectiveness of mHealth and eHealth Tools in Improving Provider Knowledge, Confidence, and Behaviors Related to Cancer Detection, Treatment, and Survivorship Care: a Systematic Review | Soloe et al         | 2021 | J. Cancer Educ.                                                                                                                                        | 2 |
| 141 | Effects of telehealth by allied health professionals and nurses in rural and remote areas: A systematic review and meta-Analysis                                                             | Speyer et al        | 2018 | J. Rehabil. Med.                                                                                                                                       | 3 |
| 142 | The introduction of computerized physician order entry and change management in a tertiary pediatric hospital                                                                                | Staley et al        | 2005 | Pediatrics                                                                                                                                             | 4 |
| 143 | The review process used by US health care plans to evaluate new medical technology for coverage                                                                                              | Steiner et al       | 1996 | Journal of general internal medicine                                                                                                                   | 4 |
| 144 | Development and Evaluation of Health Recommender Systems: Systematic Scoping Review and Evidence Mapping                                                                                     | Sun et al           | 2023 | Journal of medical Internet research                                                                                                                   | 3 |
| 145 | An innovation involving self-surveillance and serious gaming to increase smoking quit rate: Protocol for a pilot randomized controlled trial                                                 | Tan et al           | 2021 | Tobacco prevention and cessation                                                                                                                       | 4 |
| 146 | Perceived Barriers and Facilitators of Using Synchronous Telerehabilitation of Physical and Occupational Therapy in Musculoskeletal Disorders: A Scoping Review                              | Tao et al           | 2022 | medRxiv                                                                                                                                                | 4 |
| 147 | E-learning in orthopedic surgery training: A systematic review                                                                                                                               | Tarpada et al       | 2016 | Journal of Orthopaedics                                                                                                                                | 4 |
| 148 | Digital serious games in developing nursing clinical competence: A systematic review and meta-analysis                                                                                       | Thangavelu et al    | 2022 | Nursing education today                                                                                                                                | 2 |
| 149 | Telemedicine and Pancreatic Cancer: A Systematic Review                                                                                                                                      | Tripepi et al       | 2022 | Telemedicine journal and e-health : the official journal of the American Telemedicine Association                                                      | 4 |
| 150 | Scoping the allied health eHealth landscape: A failed systematic review or a casualty of the business-government divide?                                                                     | Voevodin, M.        | 2011 | Australasian Medical Journal                                                                                                                           | 2 |

|     |                                                                                                                                                                                                          |                 |      |                                                                   |   |
|-----|----------------------------------------------------------------------------------------------------------------------------------------------------------------------------------------------------------|-----------------|------|-------------------------------------------------------------------|---|
| 151 | Use of Telemedicine Technology among General Practitioners during COVID-19: A Modified Technology Acceptance Model Study in Poland                                                                       | Walczak et al   | 2022 | International journal of environmental research and public health | 4 |
| 152 | USE OF TELEMEDICINE IN GENERAL PRACTICE IN EUROPE SINCE THE COVID-19 PANDEMIC: A SCOPING REVIEW OF PATIENT AND PRACTITIONER PERSPECTIVES                                                                 | Walley et al    | 2022 | Irish journal of medical science                                  | 4 |
| 153 | A Resilience Model for Moderating Outcomes Related to Electronic Medical Record Downtime                                                                                                                 | Walsh et al     | 2022 | Studies in health technology and informatics                      | 3 |
| 154 | A systematic review of current teleophthalmology services in New Zealand compared to the four comparable countries of the United Kingdom, Australia, United States of America (UsA) and Canada           | Walsh et al     | 2021 | Clinical Ophthalmology                                            | 3 |
| 155 | Using video consultation technology between care homes and health and social care professionals: a scoping review and interview study during COVID-19 pandemic                                           | Warmoth et al   | 2022 | Age and ageing                                                    | 4 |
| 156 | A Systematic Review of Research Studies Examining Telehealth Privacy and Security Practices used by Healthcare Providers                                                                                 | Watzlaf et al   | 2017 | International journal of telerehabilitation                       | 2 |
| 157 | The impact of health information technology and e-health on the future demand for physician services                                                                                                     | Weiner et al    | 2013 | Health affairs (Project Hope)                                     | 4 |
| 158 | Health Worker mHealth Utilization: A Systematic Review                                                                                                                                                   | White et al     | 2016 | CIN Comput. Informatics Nurs.                                     | 2 |
| 159 | A Scoping Review of Integrated Medical Devices and Clinical Decision Support in the Acute Care Setting                                                                                                   | Withall et al   | 2022 | Applied clinical informatics                                      | 1 |
| 160 | The influence of web based tools on maternal and neonatal outcomes in pregnant adolescents or adolescent mothers: Mixed methods systematic review                                                        | Wu et al        | 2021 | Journal of medical Internet research                              | 2 |
| 161 | The analyzation of change in documentation due to the introduction of Electronic patient records in hospitals - A systematic review                                                                      | Wurster et al   | 2022 | Journal of medical systems                                        | 2 |
| 162 | Psychological Effects of Online-Based Mindfulness Programs during the COVID-19 Pandemic: A Systematic Review of Randomized Controlled Trials                                                             | Yeun et al      | 2022 | International journal of environmental research and public health | 3 |
| 163 | A Systematic Review of Usefulness Design Goals of Occupational Mobile Health Apps for Healthcare Workers                                                                                                 | Yingta et al    | 2021 | Lect. Notes Comput. Sci.                                          | 4 |
| 164 | Radiologists with assistance of deep learning can achieve overall accuracy of benign-malignant differentiation of musculoskeletal tumors comparable with that of pre-surgical biopsies in the literature | Zhao et al      | 2023 | International journal of computer assisted radiology and surgery  | 3 |
| 165 | The use of information and communication technology in healthcare to improve participation in everyday life: a scoping review                                                                            | Zonneveld et al | 2020 | Disabil. Rehabil.                                                 | 3 |

Legend: Reason of exclusion 1 – wrong intervention or platform was unclear; Reason 2 – the study did not provide any relevant barrier or facilitator that could be used in the project or did not provide any factor influencing healthcare providers; Reason 3 – targeted population was not healthcare providers; Reason 4 – study design used did not match with our inclusion criteria

## Supplementary Information 2 – List of barriers and facilitators categorized in the review

### Supplementary Information 2.1 - List of the 24 barriers categorized

| Code Number | Outcome and finding                                                                                                                                                |
|-------------|--------------------------------------------------------------------------------------------------------------------------------------------------------------------|
| B1          | Infrastructure and technical barriers                                                                                                                              |
| B2          | Time and workload-related barriers                                                                                                                                 |
| B3          | Training and educational barriers                                                                                                                                  |
| B4          | Lack of supervisory support                                                                                                                                        |
| B5          | Ownership issues                                                                                                                                                   |
| B6          | Health system-related barriers and financial barriers                                                                                                              |
| B7          | Cultural, social, and political barriers                                                                                                                           |
| B8          | Personal and psychological barriers                                                                                                                                |
| B9          | Simplicity of messages                                                                                                                                             |
| B10         | Interoperability issues and data incompatibility                                                                                                                   |
| B11         | Communication issues                                                                                                                                               |
| B12         | Hierarchy-related barriers                                                                                                                                         |
| B13         | Organizational-related barriers                                                                                                                                    |
| B14         | Legal- and ethical- related barriers                                                                                                                               |
| B15         | Interference between staff and patient interaction                                                                                                                 |
| B16         | Lack of leadership and champions                                                                                                                                   |
| B17         | Fears on changing clinical roles and patterns of care, and existence of blurred professional boundaries and depiction of unprofessional behavior                   |
| B18         | Disagreement with system-delivered decisions                                                                                                                       |
| B19         | Hierarchy-related barriers                                                                                                                                         |
| B20         | Issues related with studies' design and quality of the evidence                                                                                                    |
| B21         | Excessive and unnecessary amount of data required                                                                                                                  |
| B22         | Data security or equipment safety/security                                                                                                                         |
| B23         | Lack of availability of high-quality data sets for training and validating algorithms and inadequate algorithms and computational power of artificial intelligence |
| B24         | Shortage of interdisciplinary talents                                                                                                                              |

Legend: In the code number column, B stands as Barrier (s)

### Supplementary Information 2.2 - List of the 23 facilitators categorized

| Code Number | Outcome and finding                                                                                                     |
|-------------|-------------------------------------------------------------------------------------------------------------------------|
| F1          | Involvement of healthcare professionals in process of development and implementation                                    |
| F2          | Intuitive navigation                                                                                                    |
| F3          | Offer training and educational activities                                                                               |
| F4          | Perceived usefulness and willingness                                                                                    |
| F5          | Ease of use                                                                                                             |
| F6          | Existence of multiple functions of the technology                                                                       |
| F7          | Broader network coverage                                                                                                |
| F8          | Financial support                                                                                                       |
| F9          | Adherence promotion                                                                                                     |
| F10         | Government and multisector incentives                                                                                   |
| F11         | Reliability in the equipment                                                                                            |
| F12         | Integration of the technology into the practice routine                                                                 |
| F13         | Leadership and local champion                                                                                           |
| F14         | Maintenance of high-quality staff-patient interaction                                                                   |
| F15         | Pre-analysis of data and prior data processing                                                                          |
| F16         | Ownership and size of practice                                                                                          |
| F17         | Previous computer experience                                                                                            |
| F18         | Strong communication skills among healthcare professionals                                                              |
| F19         | Transition planning                                                                                                     |
| F20         | Adequate number of personal which matches with local workload and workflow or assurance of quality of life to providers |
| F21         | Technological innovativeness                                                                                            |
| F22         | Conductance of more studies or confirmed study-based evidence of effectiveness of digital health technologies           |
| F23         | Focus in the patient and in the delivery of efficient delivery of care                                                  |

Legend: In the code number column, F stands as Facilitator (s)



### **Supplementary Information 3. Figure legend and explanation of potential connections/relationships of identified barriers**

Below, we coded each barrier to signalize and report potential connections between the extracted key terms, sentences, and identifiers. It is worthwhile mentioning that these thematic relationships are not limited in our analysis. Several links and connections can still be created and organized, based on a comprehensive, logic, and collaborative approach. Therefore, the presented connections were not fully exhausted.

#### **Identifiers that have relationship with each other**

- a) 81B : 2B, 5B, 6B, and 7B
- b) 82B and 83B : 9B
- c) 58B : 3B
- d) 27B : 30B
- e) 19B: 28B, 58B
- f) 30B : 25B, 33B, 58B, and 3B
- g) 4B : 30B
- h) 102B : 8B
- i) 42B : 26B, 54B,
- j) 46B : 34B, 42B
- k) 39B : 50B
- l) 38B : 72B, 73B
- m) 45B : 67B
- n) 78B : 98B : 106B
- o) 15B : 60B, 61B, 65B
- p) 77B : 41B,
- q) 80B : 102B
- r) 68B : 105B, 102B, 94B
- s) 60B : 104B, 102B, 103B
- t) 61B : 101B, 18B
- u) 62B : 103B
- v) 59B : 91B
- w) 102B : 46B
- x) 100B : 101B
- y) 88B : 58B, 19B
- z) 89B : 19B
- aa) 86B : 32B
- bb) 86B : 32B, 94B
- cc) 101B : 29B
- dd) 94B : 54B, 84B
- ee) 49B : 93B
- ff) 89B : 45B, 97BB
- gg) 51B : 98B
- hh) 84B : 37B, 99B,
- ii) 16B : 101B
- jj) 32B : 94B
- kk) 104B : 82B
- ll) 101B, 102B, 103B, 104B, and 105B : 108B
- mm) 75B : 107B

## Supplementary Information 4 – Protocol registered on PROSPERO

**PROSPERO**  
International prospective register of systematic reviews

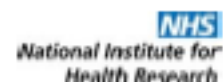

UNIVERSITY *of York*  
Centre for Reviews and Dissemination

### Systematic review

A list of fields that can be edited in an update can be found [here](#)

#### 1. \* Review title.

Give the title of the review in English

The impact of digital health solutions on health workers: an overview of systematic reviews

#### 2. Original language title.

For reviews in languages other than English, give the title in the original language. This will be displayed with the English language title.

#### 3. \* Anticipated or actual start date.

Give the date the systematic review started or is expected to start.

21/01/2022

#### 4. \* Anticipated completion date.

Give the date by which the review is expected to be completed.

31/03/2022

#### 5. \* Stage of review at time of this submission.

This field uses answers to initial screening questions. It cannot be edited until after registration.

Tick the boxes to show which review tasks have been started and which have been completed.

Update this field each time any amendments are made to a published record.

The review has not yet started: Yes

| Review stage                                                    | Started | Completed |
|-----------------------------------------------------------------|---------|-----------|
| Preliminary searches                                            | No      | No        |
| Piloting of the study selection process                         | No      | No        |
| Formal screening of search results against eligibility criteria | No      | No        |
| Data extraction                                                 | No      | No        |
| Risk of bias(quality) assessment                                | No      | No        |
| Data analysis                                                   | No      | No        |

Provide any other relevant information about the stage of the review here.

**6. \* Named contact.**

The named contact is the guarantor for the accuracy of the information in the register record. This may be any member of the review team.

Israel Junior Borges do Nascimento

Email salutation (e.g. "Dr Smith" or "Joanne") for correspondence:

Dr Borges do Nascimento

**7. \* Named contact email.**

Give the electronic email address of the named contact.

israeljrbn@gmail.com

**8. Named contact address**

Give the full institutional/organisational postal address for the named contact.

Medical Sciences Divisional Office - University of Oxford - Level 3, John Radcliffe Hospital Oxford OX3 9DU,  
United Kingdom

**9. Named contact phone number.**

Give the telephone number for the named contact, including international dialling code.

+ 1 860 869 7285

**10. \* Organisational affiliation of the review.**

Full title of the organisational affiliations for this review and website address if available. This field may be completed as 'None' if the review is not affiliated to any organisation.

Medical Sciences Divisional Office - University of Oxford

Organisation web address:

**11. \* Review team members and their organisational affiliations.**

Give the personal details and the organisational affiliations of each member of the review team. Affiliation refers to groups or organisations to which review team members belong. NOTE: email and country now MUST be entered for each person, unless you are amending a published record.

Dr Israel Junior Borges do Nascimento. Medical Sciences Divisional Office - University of Oxford  
Dr David Novillo Ortiz. Division of Country Health Policies and Systems, World Health Organization, regional office for Europe, Copenhagen, Denmark  
Dr Hebatullah Mohamed Abdulazeem. Department of Sport and Health Science, Technische Universität München, Munich, Germany  
Dr Lasse Østengaard. Cochrane Denmark Centre for Evidence-Based Medicine Odense (CEBMO) University Library of Southern Denmark  
Dr Tomas Zapata Lopez. Division of Country Health Policies and Systems, World Health Organization,

regional office for Europe, Copenhagen, Denmark

**12. \* Funding sources/sponsors.**

Details of the individuals, organizations, groups, companies or other legal entities who have funded or sponsored the review.

None

**Grant number(s)**

State the funder, grant or award number and the date of award

**13. \* Conflicts of interest.**

List actual or perceived conflicts of interest (financial or academic).

None

**14. Collaborators.**

Give the name and affiliation of any individuals or organisations who are working on the review but who are not listed as review team members. NOTE: email and country must be completed for each person, unless you are amending a published record.

**15. \* Review question.**

State the review question(s) clearly and precisely. It may be appropriate to break very broad questions down into a series of related more specific questions. Questions may be framed or refined using PICO or similar where relevant.

What is the impact of digital health solutions on health workers? What are the most solid evidence effects associated with the use of digital health technologies on the overall health worker? What are the main opportunities and challenges associated with the use of digital health solutions in health workers? Are there recommendations to be developed in the adoption and implementation of digital health solutions by health workers?

**16. \* Searches.**

State the sources that will be searched (e.g. Medline). Give the search dates, and any restrictions (e.g. language or publication date). Do NOT enter the full search strategy (it may be provided as a link or attachment below.)

Based on a search strategy created by an experienced librarian, we will retrieve systematic reviews from five scientific databases: Cochrane Library (i.e., Cochrane Database of Systematic Reviews), Embase, Epistemonikos, MEDLINE, and Scopus. The planned retrieval date is December 23, 2021. We will not impose any language restriction on the obtained publications and for the purpose of this study, a systematic review will be defined as a review study, which followed evidence-based medicine related guidelines, and which considered at least 2 databases for its systematic search. Furthermore, the study should describe the search strategy used throughout the study idealization and should present a clear methodology for study selection and data extraction. We will include only systematic reviews that precisely analyze the current evidence associated with the use of digital health solutions in health workers, regardless the type of

outcomes assessed, and the type of primary studies included. We will exclude preprints, as well as unpublished data, and narrative or literature reviews. As part of a supplementary search, we will look at primarily selected papers references' lists and for the first 100 Google Scholar search results.

#### **17. URL to search strategy.**

Upload a file with your search strategy, or an example of a search strategy for a specific database, (including the keywords) in pdf or word format. In doing so you are consenting to the file being made publicly accessible. Or provide a URL or link to the strategy. Do NOT provide links to your search results.

Alternatively, upload your search strategy to CRD in pdf format. Please note that by doing so you are consenting to the file being made publicly accessible.

**Do not make this file publicly available until the review is complete**

#### **18. \* Condition or domain being studied.**

Give a short description of the disease, condition or healthcare domain being studied in your systematic review.

**Digital health solutions, Health workers, Systematic review, Evidence-based medicine.**

#### **19. \* Participants/population.**

Specify the participants or populations being studied in the review. The preferred format includes details of both inclusion and exclusion criteria.

**Studies will be included in which health workers (either from the first, secondary, or tertiary level of care) are the focus of eligible systematic reviews.**

#### **20. \* Intervention(s), exposure(s).**

Give full and clear descriptions or definitions of the interventions or the exposures to be reviewed. The preferred format includes details of both inclusion and exclusion criteria.

**We will include systematic reviews that directly evaluate the effect of digital health solutions on health workers.**

#### **21. \* Comparator(s)/control.**

Where relevant, give details of the alternatives against which the intervention/exposure will be compared (e.g. another intervention or a non-exposed control group). The preferred format includes details of both inclusion and exclusion criteria.

**We will include systematic reviews that potentially compare digital health solutions/technologies in health workers to non-health workers. However, if a specific systematic review primarily did not focus on the existence of any comparator or controlling factor, we will consider this study for inclusion.**

#### **22. \* Types of study to be included.**

Give details of the study designs (e.g. RCT) that are eligible for inclusion in the review. The preferred format includes both inclusion and exclusion criteria. If there are no restrictions on the types of study, this should be stated.

**Systematic reviews (with or without meta-analysis), that were published in peer-reviewed journal. Moreover,**



we will consider the inclusion of scoping reviews, depending of the existence and report of adequately methodological characteristics (such as the existence of search strategies, a comprehensive study selection criteria, and a clear data summarization). We will not restrict this overview of systematic reviews based on the type of primary studies; therefore, if a certain systematic review includes randomized trials, observational studies, or mixed-method studies, it will be deemed eligible.

### 23. Context.

Give summary details of the setting or other relevant characteristics, which help define the inclusion or exclusion criteria.

Over the last number of years, several digital solutions have emerged as a significant and impactful alternative in human life. Precisely, these interventions have gained a wider space in the healthcare settings, particularly among health workers. To the best of our knowledge, no previous systematic review has been taken in place to understand the impact of digital health solutions in health workers, neither to assess the current evidence of its effects in the healthcare workplace. Therefore, in this systematic review we aim to collate, analyze, and verify the available evidence of the impact of these digital solutions in health workers, as well as to identify the main challenges, opportunities, and raise recommendations for the use of digital solutions by health workers.

### 24. ~~Challenges~~ Outcome(s).

Give the pre-specified main (most important) outcomes of the review, including details of how the outcome is defined and measured and when these measurement are made, if these are part of the review inclusion criteria.

~~Our primary outcome of digital solutions or technologies on health workers (beneficial, negative, or any additional description of general effectiveness);~~

2. The awareness, feasibility, and acceptability of health workers of these digital interventions (using validated or non-validated structure/semi-structure questionnaire).

Moreover, we will analyze the potential effectiveness of digital solutions in improving clinical knowledge (i.e., improvement of delivered care, achievement of decreasing waiting time for medical procedures or medical evaluation, and so forth), staff behaviors, and practices on healthcare.

Furthermore, we will identify opportunities and challenges and develop recommendations in the adoption and implementation of digital health solutions by health workers. In addition, we plan to obtain studies that evaluate the social, economic, or medical impact of these solutions in the public health system in general (not only focused on health workers, but also in the functioning of the health environment).

### Measures of effect

Please specify the effect measure(s) for you main outcome(s) e.g. relative risks, odds ratios, risk difference, and/or 'number needed to treat.

### 25. ~~Additional~~ Additional outcome(s).

List the pre-specified additional outcomes of the review, with a similar level of detail to that required for main outcomes. Where there are no additional outcomes please state 'None' or 'Not applicable' as appropriate to the review

None.

### Measures of effect

Please specify the effect measure(s) for you additional outcome(s) e.g. relative risks, odds ratios, risk difference, and/or 'number needed to treat.

### 26. ~~Change~~ Data extraction (selection and coding).

Describe how studies will be selected for inclusion. State what data will be extracted or obtained. State how this will be done and recorded.

The results from the literature search performed by the information specialist will be uploaded to the online software, Covidence to allow inter-investigators collaboration. After duplicates removal, two independent reviewers will assess titles and abstracts to filter the studies that are most likely to be included. Afterwards, two reviewers will carry out full-text screening based on the beforementioned inclusion criteria. We will record the reasons for exclusion of each ineligible studies in this stage and report the justifications for exclusion in the final manuscript. We will resolve discrepancies either discussing between two reviewers or by the judgment of a third party. After categorization of finally included studies, two investigators will extract available data and investigate the methodological quality using an appropriate tool. If any discrepancy is noted at this stage, it will be resolved by consensus or a third reviewer. We will extract the following information from the selected studies: 1. general information (publication year, country, journal name, journal impact factor, disclosure of competing interests, and type or feature evaluated from the systematic review) 2. overall impact of digital solution in health worker (either qualitative or quantitative); 3. specific applicability of the digital solution in health worker environment; 4. the overall effect of digital health solutions in health worker (regardless the main focus from the eligible record); 5. main challenges, opportunities, and future recommendation from included reviews; and 6. limitations from included reviews. We will not restrict the data potentially available for extraction in these six main items. Therefore, if we identify any type of pattern among included reviews that might be relevant for inclusion, we will make the data displayed and will make a specific statement in the final publication regarding the addition of these outcome(s).

### 27. \* Risk of bias (quality) assessment.

State which characteristics of the studies will be assessed and/or any formal risk of bias/quality assessment tools that will be used.

The methodological assessment of included systematic reviews will be based on the "Assessing the Methodological Quality of Systematic Reviews 2" tool. Overall, 16 critical domains are evaluated online, and a final rating is displayed by the software algorithm.

### 28. ~~Change~~ Strategy for data synthesis.

Describe the methods you plan to use to synthesise data. This must not be generic text but should be

specific to your review and describe how the proposed approach will be applied to your data. If meta-analysis is planned, describe the models to be used, methods to explore statistical heterogeneity, and software package to be used.

We do not intend to perform a meta-analysis in the overview of systematic reviews. We will qualitatively describe the general characteristics of the included studies in summary tables using measures tendencies/units (primarily extracted by two reviews, using Microsoft Excel software). In addition, we plan to combine quantitative data into infographics, tables, or text-based medias to summarize the main results of each included systematic review. Therefore, a narrative synthesis is more likely to be created, in order to demonstrate the main findings of included studies, structured around the features targeted of primarily included systematic reviews. We will not restrict our synthetical analyses based on the number of final included studies. As the summary of effects among included studies can be varied and the measured outcomes might be multiples, we intend to include in our qualitative summary risk ratios, odds ratios, frequency values, and so forth.

#### 29. \* Analysis of subgroups or subsets.

State any planned investigation of 'subgroups'. Be clear and specific about which type of study or participant will be included in each group or covariate investigated. State the planned analytic approach.

None is intended to be performed as overviews of systematic reviews does not typically involves subgroups analyses.

#### 30. \* Type and method of review.

Select the type of review, review method and health area from the lists below.

##### Type of review

Cost effectiveness

No

Diagnostic

No

Epidemiologic

No

Individual patient data (IPD) meta-analysis

No

Intervention

No

Living systematic review

No

Meta-analysis

No

Methodology

Yes

Narrative synthesis

Yes



## PROSPERO

### International prospective register of systematic reviews

Network meta-analysis

No

Pre-clinical

No

Prevention

No

Prognostic

No

Prospective meta-analysis (PMA)

No

Review of reviews

Yes

Service delivery

No

Synthesis of qualitative studies

No

Systematic review

Yes

Other

No

### Health area of the review

Alcohol/substance misuse/abuse

No

Blood and immune system

No

Cancer

No

Cardiovascular

No

Care of the elderly

No

Child health

No

Complementary therapies

No

COVID-19

No

Crime and justice

No

Dental

No

Digestive system

**PROSPERO**  
International prospective register of systematic reviews

No

Ear, nose and throat  
No

Education  
No

Endocrine and metabolic disorders  
No

Eye disorders  
No

General interest  
Yes

Genetics  
No

Health inequalities/health equity  
Yes

Infections and infestations  
No

International development  
No

Mental health and behavioural conditions  
No

Musculoskeletal  
No

Neurological  
No

Nursing  
No

Obstetrics and gynaecology  
No

Oral health  
No

Palliative care  
No

Perioperative care  
No

Physiotherapy  
No

Pregnancy and childbirth  
No

Public health (including social determinants of health)  
Yes

Rehabilitation  
No

**PROSPERO**  
**International prospective register of systematic reviews**

Respiratory disorders  
No

Service delivery  
Yes

Skin disorders  
No

Social care  
No

Surgery  
No

Tropical Medicine  
No

Urological  
No

Wounds, injuries and accidents  
No

Violence and abuse  
No

**31. Language.**

Select each language individually to add it to the list below, use the bin icon to remove any added in error.

English

There is not an English language summary

**32. \* Country.**

Select the country in which the review is being carried out. For multi-national collaborations select all the countries involved.

Brazil

Denmark

England

Germany

**33. Other registration details.**

Name any other organisation where the systematic review title or protocol is registered (e.g. Campbell, or The Joanna Briggs Institute) together with any unique identification number assigned by them. If extracted data will be stored and made available through a repository such as the Systematic Review Data Repository (SRDR), details and a link should be included here. If none, leave blank.

**34. Reference and/or URL for published protocol.**

If the protocol for this review is published provide details (authors, title and journal details, preferably in Vancouver format)

Add web link to the published protocol.

Or, upload your published protocol here in pdf format. Note that the upload will be publicly accessible.

**No I do not make this file publicly available until the review is complete**

**PROSPERO**  
**International prospective register of systematic reviews**

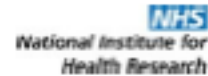

Please note that the information required in the PROSPERO registration form must be completed in full even if access to a protocol is given.

**35. Dissemination plans.**

Do you intend to publish the review on completion?

**Yes**

Give brief details of plans for communicating review findings.?

The paper will be potentially submitted to the Bulletin of the World Health Organization

(<https://www.who.int/publications/journals/bulletin>)

**36. Keywords.**

Give words or phrases that best describe the review. Separate keywords with a semicolon or new line. Keywords help PROSPERO users find your review (keywords do not appear in the public record but are included in searches). Be as specific and precise as possible. Avoid acronyms and abbreviations unless these are in wide use.

Digital health, health workers, systematic review, overview, evidence-based medicine.

**37. Details of any existing review of the same topic by the same authors.**

If you are registering an update of an existing review give details of the earlier versions and include a full bibliographic reference, if available.

**38. \* Current review status.**

Update review status when the review is completed and when it is published. New registrations must be ongoing so this field is not editable for initial submission.

Please provide anticipated publication date

Review\_Ongoing

**39. Any additional information.**

Provide any other information relevant to the registration of this review.

**40. Details of final report/publication(s) or preprints if available.**

Leave empty until publication details are available OR you have a link to a preprint (NOTE: this field is not editable for initial submission). List authors, title and journal details preferably in Vancouver format.

Give the link to the published review or preprint.

## Supplementary Information 5 – Search strategies

Search details for

### OVERVIEW OF SYSTEMATIC REVIEWS OF THE IMPACT OF DIGITAL HEALTH SOLUTIONS IN HEALTH WORKERS

By: Lasse Østengaard

The searches were conducted on the following dates:

- Initial search: January 21, 2022
- Updated search: March 1, 2023

Databases: Embase (Ovid), MEDLINE (Ovid), Cochrane library, Scopus and Epistemonikos.

Embase Classic+Embase 1947 to 2023 March 1

| Embase Classic+Embase |                                                                                                                                                                 |
|-----------------------|-----------------------------------------------------------------------------------------------------------------------------------------------------------------|
|                       |                                                                                                                                                                 |
| 1                     | exp telehealth/                                                                                                                                                 |
| 2                     | ((Digital or mobile or smart) adj3 health).ti,ab.                                                                                                               |
| 3                     | (telehealth or telemedicine or telemonitoring).ti,ab.                                                                                                           |
| 4                     | exp mobile application/                                                                                                                                         |
| 5                     | internet/                                                                                                                                                       |
| 6                     | exp mobile phone/                                                                                                                                               |
| 7                     | personal digital assistant/                                                                                                                                     |
| 8                     | Medical Informatics Applications/                                                                                                                               |
| 9                     | computer assisted therapy/                                                                                                                                      |
| 10                    | (app or apps).ti,ab.                                                                                                                                            |
| 11                    | (online or internet or web* or digital* or tele* or google).ti.                                                                                                 |
| 12                    | ((online or internet or web* or digital*) adj3 (based or application* or intervention* or program* or therap*)).ab.                                             |
| 13                    | (phone* or telephone* or smartphone* or cellphone* or smartwatch*).ti.                                                                                          |
| 14                    | ((phone* or telephone* or smartphone* or cellphone* or smartwatch*) adj3 (based or application* or intervention* or program* or therap*)).ab.                   |
| 15                    | (mobile health or mhealth or m-health or ehealth or e-health or emental or e-mental).ti.                                                                        |
| 16                    | ((mobile health or mhealth or m-health or ehealth or e-health or emental or e-mental) adj3 (based or application* or intervention* or program* or therap*)).ab. |
| 17                    | (mobile* adj3 (based or application* or intervention* or device* or technolog*)).ti,ab.                                                                         |
| 18                    | (Connected Devices or Smart Devices or Digital Assistant).ti,ab.                                                                                                |
| 19                    | exp medical informatics/ or exp electronic health record/ or electronic medical record/ or electronic patient record/                                           |
| 20                    | ((Health or medical) adj3 (record* or informati* or data)).ti,ab.                                                                                               |
| 21                    | (digital record* or personalized medicine or personalised medicine or interoperability).ti,ab.                                                                  |
| 22                    | exp artificial intelligence/ or exp machine learning/ or exp natural language processing/                                                                       |

|    |                                                                                                                                                                                                                                                                           |
|----|---------------------------------------------------------------------------------------------------------------------------------------------------------------------------------------------------------------------------------------------------------------------------|
| 23 | ((Artificial or machine or deep or hierarchical or ambient or comput*) adj3 (intelligence or learning)).ti,ab.                                                                                                                                                            |
| 24 | ((Computer or automated) adj3 reasoning).ti,ab.                                                                                                                                                                                                                           |
| 25 | (Knowledge adj3 (acquisition or representation*)).ti,ab.                                                                                                                                                                                                                  |
| 26 | natural language processing.ti,ab.                                                                                                                                                                                                                                        |
| 27 | (AI or NLP).ti,ab.                                                                                                                                                                                                                                                        |
| 28 | exp social media/                                                                                                                                                                                                                                                         |
| 29 | (social media or social network or Facebook or twitter or youtube or Instagram or flickr or Linkedin or blog* or on-line communit* or online communit* or wiki* or big data or open data or data mining or cloud or bluetooth or wearable* or wireless technology).ti,ab. |
| 30 | 1 or 2 or 3 or 4 or 5 or 6 or 7 or 8 or 9 or 10 or 11 or 12 or 13 or 14 or 15 or 16 or 17 or 18 or 19 or 20 or 21 or 22 or 23 or 24 or 25 or 26 or 27 or 28 or 29                                                                                                         |
| 31 | exp health care personnel/                                                                                                                                                                                                                                                |
| 32 | ((Health* or medical) adj3 (personnel or professional* or provider* or worker* or practitioner* or aide*)).ti,ab.                                                                                                                                                         |
| 33 | 31 or 32                                                                                                                                                                                                                                                                  |
| 34 | exp "systematic review"/ or exp meta analysis/                                                                                                                                                                                                                            |
| 35 | exp "systematic review (topic)"/ or exp "meta analysis (topic)"/                                                                                                                                                                                                          |
| 36 | ((systematic or scoping) adj3 (review* or overview*)).ti,ab.                                                                                                                                                                                                              |
| 37 | (meta analy* or metaanaly* or meta-analy*).ti,ab.                                                                                                                                                                                                                         |
| 38 | 34 or 35 or 36 or 37                                                                                                                                                                                                                                                      |
| 39 | 30 and 33 and 38                                                                                                                                                                                                                                                          |

Number of results from the first search in Embase: 6026  
 Number of results from the updated search in Embase: 1946  
 Total number of results from Embase 7972

Ovid MEDLINE(R) ALL 1946 to March 1, 2023

| Ovid MEDLINE(R) ALL |                                                                 |
|---------------------|-----------------------------------------------------------------|
|                     |                                                                 |
| 1                   | exp Telemedicine/                                               |
| 2                   | ((Digital or mobile or smart) adj3 health).ti,ab.               |
| 3                   | (telehealth or telemedicine or telemonitoring).ti,ab.           |
| 4                   | Mobile Applications/                                            |
| 5                   | exp Internet/                                                   |
| 6                   | exp Cell Phone/                                                 |
| 7                   | exp Computers, Handheld/                                        |
| 8                   | Medical Informatics Applications/                               |
| 9                   | Therapy, Computer-Assisted/                                     |
| 10                  | (app or apps).ti,ab.                                            |
| 11                  | (online or internet or web* or digital* or tele* or google).ti. |

|    |                                                                                                                                                                                                                                                                           |
|----|---------------------------------------------------------------------------------------------------------------------------------------------------------------------------------------------------------------------------------------------------------------------------|
| 12 | ((online or internet or web* or digital*) adj3 (based or application* or intervention* or program* or therap*)).ab.                                                                                                                                                       |
| 13 | (phone* or telephone* or smartphone* or cellphone* or smartwatch*).ti.                                                                                                                                                                                                    |
| 14 | ((phone* or telephone* or smartphone* or cellphone* or smartwatch*) adj3 (based or application* or intervention* or program* or therap*)).ab.                                                                                                                             |
| 15 | (mobile health or mhealth or m-health or ehealth or e-health or emental or e-mental).ti.                                                                                                                                                                                  |
| 16 | ((mobile health or mhealth or m-health or ehealth or e-health or emental or e-mental) adj3 (based or application* or intervention* or program* or therap*)).ab.                                                                                                           |
| 17 | (mobile* adj3 (based or application* or intervention* or device* or technolog*)).ti,ab.                                                                                                                                                                                   |
| 18 | (Connected Devices or Smart Devices or Digital Assistant).ti,ab.                                                                                                                                                                                                          |
| 19 | exp Medical Informatics/ or exp Medical Records Systems, Computerized/                                                                                                                                                                                                    |
| 20 | ((Health or medical) adj3 (record* or informati* or data)).ti,ab.                                                                                                                                                                                                         |
| 21 | (digital record* or personalized medicine or personalised medicine or interoperability).ti,ab.                                                                                                                                                                            |
| 22 | exp Artificial Intelligence/                                                                                                                                                                                                                                              |
| 23 | ((Artificial or machine or deep or hierarchical or ambient or comput*) adj3 (intelligence or learning)).ti,ab.                                                                                                                                                            |
| 24 | ((Computer or automated) adj3 reasoning).ti,ab.                                                                                                                                                                                                                           |
| 25 | (Knowledge adj3 (acquisition or representation*)).ti,ab.                                                                                                                                                                                                                  |
| 26 | natural language processing.ti,ab.                                                                                                                                                                                                                                        |
| 27 | (AI or NLP).ti,ab.                                                                                                                                                                                                                                                        |
| 28 | exp Social Media/                                                                                                                                                                                                                                                         |
| 29 | (social media or social network or Facebook or twitter or youtube or Instagram or flickr or Linkedin or blog* or on-line communit* or online communit* or wiki* or big data or open data or data mining or cloud or bluetooth or wearable* or wireless technology).ti,ab. |
| 30 | 1 or 2 or 3 or 4 or 5 or 6 or 7 or 8 or 9 or 10 or 11 or 12 or 13 or 14 or 15 or 16 or 17 or 18 or 19 or 20 or 21 or 22 or 23 or 24 or 25 or 26 or 27 or 28 or 29                                                                                                         |
| 31 | exp Health Personnel/                                                                                                                                                                                                                                                     |
| 32 | ((Health* or medical) adj3 (personnel or professional* or provider* or worker* or practitioner* or aide*)).ti,ab.                                                                                                                                                         |
| 33 | 31 or 32                                                                                                                                                                                                                                                                  |
| 34 | exp "systematic review"/ or exp meta-analysis/                                                                                                                                                                                                                            |
| 35 | exp Systematic Reviews as Topic/ or exp Meta-Analysis as Topic/                                                                                                                                                                                                           |
| 36 | ((systematic or scoping) adj3 (review* or overview*)).ti,ab.                                                                                                                                                                                                              |
| 37 | (meta analy* or metaanaly* or meta-analy*).ti,ab.                                                                                                                                                                                                                         |
| 38 | 34 or 35 or 36 or 37                                                                                                                                                                                                                                                      |
| 39 | 30 and 33 and 38                                                                                                                                                                                                                                                          |

Number of results from the first search in MEDLINE: 3021  
 Number of results from the updated search in MEDLINE: 639  
 Total number of results from MEDLINE 3660

Cochrane library

| ID  | Search                                                                                                                                                                                                                                                                                      |
|-----|---------------------------------------------------------------------------------------------------------------------------------------------------------------------------------------------------------------------------------------------------------------------------------------------|
| #1  | MeSH descriptor: [Telemedicine] explode all trees                                                                                                                                                                                                                                           |
| #2  | ((((Digital or mobile or smart) near/2 health)):ti,ab,kw                                                                                                                                                                                                                                    |
| #3  | (telehealth or telemedicine or telemonitoring):ti,ab,kw                                                                                                                                                                                                                                     |
| #4  | MeSH descriptor: [Mobile Applications] this term only                                                                                                                                                                                                                                       |
| #5  | MeSH descriptor: [Internet] explode all trees                                                                                                                                                                                                                                               |
| #6  | MeSH descriptor: [Cell Phone] explode all trees                                                                                                                                                                                                                                             |
| #7  | MeSH descriptor: [Computers, Handheld] explode all trees                                                                                                                                                                                                                                    |
| #8  | MeSH descriptor: [Medical Informatics Applications] this term only                                                                                                                                                                                                                          |
| #9  | MeSH descriptor: [Therapy, Computer-Assisted] this term only                                                                                                                                                                                                                                |
| #10 | (app or apps):ti,ab,kw                                                                                                                                                                                                                                                                      |
| #11 | (online or internet or web* or digital* or tele* or google):ti                                                                                                                                                                                                                              |
| #12 | ((((online or internet or web* or digital*) near/2 (based or application* or intervention* or program* or therap*)):ab                                                                                                                                                                      |
| #13 | (phone* or telephone* or smartphone* or cellphone* or smartwatch*):ti                                                                                                                                                                                                                       |
| #14 | ((((phone* or telephone* or smartphone* or cellphone* or smartwatch*) near/2 (based or application* or intervention* or program* or therap*)):ab                                                                                                                                            |
| #15 | ("mobile health" or mhealth or m-health or ehealth or e-health or emental or e-mental):ti                                                                                                                                                                                                   |
| #16 | ((("mobile health" or mhealth or m-health or ehealth or e-health or emental or e-mental) near/2 (based or application* or intervention* or program* or therap*)):ab                                                                                                                         |
| #17 | ((mobile* near/2 (based or application* or intervention* or device* or technolog*)):ti,ab,kw                                                                                                                                                                                                |
| #18 | ("Connected Devices" or "Smart Devices" or "Digital Assistant"):ti,ab,kw                                                                                                                                                                                                                    |
| #19 | MeSH descriptor: [Medical Informatics] explode all trees                                                                                                                                                                                                                                    |
| #20 | MeSH descriptor: [Medical Records Systems, Computerized] explode all trees                                                                                                                                                                                                                  |
| #21 | ((((Health or medical) near/2 (record* or informati* or data)):ti,ab,kw                                                                                                                                                                                                                     |
| #22 | ("digital record*" or "personalised medicine" or "personalized medicine" or interoperability):ti,ab,kw                                                                                                                                                                                      |
| #23 | MeSH descriptor: [Artificial Intelligence] explode all trees                                                                                                                                                                                                                                |
| #24 | ((((Artificial or machine or deep or hierarchical or ambient or comput*) near/2 (intelligence or learning)):ti,ab,kw                                                                                                                                                                        |
| #25 | ((((Computer or automated) near/2 reasoning)):ti,ab,kw                                                                                                                                                                                                                                      |
| #26 | ((Knowledge near/2 (acquisition or representation*)):ti,ab,kw                                                                                                                                                                                                                               |
| #27 | ("natural language processing"):ti,ab,kw                                                                                                                                                                                                                                                    |
| #28 | (AI or NLP):ti,ab,kw                                                                                                                                                                                                                                                                        |
| #29 | MeSH descriptor: [Social Media] explode all trees                                                                                                                                                                                                                                           |
| #30 | ("social media" or "social network" or Facebook or twitter or youtube or Instagram or flickr or Linkedin or blog* or "on-line communit*" or "online communit*" or wiki* or "big data" or "open data" or "data mining" or cloud or bluetooth or wearable* or "wireless technology"):ti,ab,kw |
| #31 | #1 or #2 or #3 or #4 or #5 or #6 or #7 or #8 or #9 or #10 or #11 or #12 or #13 or #14 or #15 or #16 or #17 or #18 or #19 or #20 or #21 or #22 or #23 or #24 or #25 or #26 or #27 or #28 or #29 or #30                                                                                       |
| #32 | MeSH descriptor: [Health Personnel] explode all trees                                                                                                                                                                                                                                       |



|     |                                                                                                                          |
|-----|--------------------------------------------------------------------------------------------------------------------------|
| #33 | (((Health* or medical) near/2 (personnel or professional* or provider* or worker* or practitioner* or aide*))) :ti,ab,kw |
| #34 | #32 or #33                                                                                                               |
| #35 | #31 AND #34                                                                                                              |
| #36 | #31 AND #34 in Cochrane Reviews                                                                                          |

Number of results from the first search in Cochrane library: 146

Number of results from the updated search in Cochrane library: 4

Total number of results from Cochrane library 150

## Scopus

|        | Search Terms                                                                                                                                                                                                                                                                                                                                                                                                                                                                                                                                                                                                                                                                                                                                                                                                                                                                                                                                                                                                                                                                                                                                                                                                                                                                                                                                                                                                                                                                                                                                                                                                                                                                                                                                                                                                                                                                                                                                                                                                                 |
|--------|------------------------------------------------------------------------------------------------------------------------------------------------------------------------------------------------------------------------------------------------------------------------------------------------------------------------------------------------------------------------------------------------------------------------------------------------------------------------------------------------------------------------------------------------------------------------------------------------------------------------------------------------------------------------------------------------------------------------------------------------------------------------------------------------------------------------------------------------------------------------------------------------------------------------------------------------------------------------------------------------------------------------------------------------------------------------------------------------------------------------------------------------------------------------------------------------------------------------------------------------------------------------------------------------------------------------------------------------------------------------------------------------------------------------------------------------------------------------------------------------------------------------------------------------------------------------------------------------------------------------------------------------------------------------------------------------------------------------------------------------------------------------------------------------------------------------------------------------------------------------------------------------------------------------------------------------------------------------------------------------------------------------------|
| 2<br>6 | (( (TITLE-ABS-KEY (telehealth OR telemedicine OR telemonitoring)) OR (TITLE-ABS-KEY ((digital OR mobile OR smart) W/2 health)) OR (TITLE-ABS-KEY ("mobile applications" OR internet OR "cell phone" OR "handheld computer*" OR "computer-assisted therapy")) OR (TITLE-ABS-KEY (app OR apps)) OR (TITLE (online OR internet OR web* OR digital* OR tele* OR google)) OR (ABS ((online OR internet OR web* OR digital*) W/2 (based OR application* OR intervention* OR program* OR therap*))) OR (TITLE (phone* OR telephone* OR smartphone* OR cellphone* OR smartwatch*)) OR (ABS ((phone* OR telephone* OR smartphone* OR cellphone* OR smartwatch*) W/2 (based OR application* OR intervention* OR program* OR therap*))) OR (TITLE ("mobile health" OR mhealth OR m-health OR ehealth OR e-health OR emental OR e-mental)) OR (ABS (( "mobile health" OR mhealth OR m-health OR ehealth OR e-health OR emental OR e-mental) W/2 (based OR application* OR intervention* OR program* OR therap*))) OR (TITLE-ABS-KEY (mobile* W/2 (based OR application* OR intervention* OR device* OR technolog*))) OR (TITLE-ABS-KEY ("connected devices" OR "smart devices" OR "digital assistant")) OR (TITLE-ABS-KEY ((health OR medical) W/2 (record* OR informati* OR data))) OR (TITLE-ABS-KEY ("digital record*" OR "personalized medicine" OR "personalised medicine" OR interoperability)) OR (TITLE-ABS-KEY ((artificial OR machine OR deep OR hierarchical OR ambient OR comput*) W/2 (intelligence OR learning))) OR (TITLE-ABS-KEY ((computer OR automated) W/2 reasoning)) OR (TITLE-ABS-KEY (knowledge W/2 (acquisition OR representation*))) OR (TITLE-ABS-KEY ("natural language processing")) OR (TITLE-ABS-KEY (ai OR nlp)) OR (TITLE-ABS-KEY ("social media" OR "social network" OR facebook OR twitter OR youtube OR instagram OR flickr OR linkedin OR blog* OR "on-line communit*" OR "online communit*" OR wiki* OR "big data" OR "open data" OR "data mining" OR cloud OR bluetooth OR wearable* OR "wireless |

|        |                                                                                                                                                                                                                                                                                                                                                                                                                                                                                                                                                                                                                                                                                                                                                                                                                                                                                                                                                                                                                                                                                                                                                                                                                                                                                                                                                                                                                                                                                                                                                                                                                                                                                                                                                                                                                                                                                                                                                                                                                                                                                                                          |
|--------|--------------------------------------------------------------------------------------------------------------------------------------------------------------------------------------------------------------------------------------------------------------------------------------------------------------------------------------------------------------------------------------------------------------------------------------------------------------------------------------------------------------------------------------------------------------------------------------------------------------------------------------------------------------------------------------------------------------------------------------------------------------------------------------------------------------------------------------------------------------------------------------------------------------------------------------------------------------------------------------------------------------------------------------------------------------------------------------------------------------------------------------------------------------------------------------------------------------------------------------------------------------------------------------------------------------------------------------------------------------------------------------------------------------------------------------------------------------------------------------------------------------------------------------------------------------------------------------------------------------------------------------------------------------------------------------------------------------------------------------------------------------------------------------------------------------------------------------------------------------------------------------------------------------------------------------------------------------------------------------------------------------------------------------------------------------------------------------------------------------------------|
|        | technology" ))) AND ( TITLE-ABS-KEY ( ( health* OR medical ) W/2 ( personnel OR professional* OR provider* OR worker* OR practitioner* OR aide* ))) AND ( ( TITLE-ABS-KEY ( ( systematic OR scoping ) W/2 ( review* OR overview* ))) OR ( TITLE-ABS-KEY ( "meta analy*" OR metaanaly* OR meta-analy* ))) ...View More                                                                                                                                                                                                                                                                                                                                                                                                                                                                                                                                                                                                                                                                                                                                                                                                                                                                                                                                                                                                                                                                                                                                                                                                                                                                                                                                                                                                                                                                                                                                                                                                                                                                                                                                                                                                    |
| 2<br>5 | ( TITLE-ABS-KEY ( ( systematic OR scoping ) W/2 ( review* OR overview* ))) OR ( TITLE-ABS-KEY ( "meta analy*" OR metaanaly* OR meta-analy* ))                                                                                                                                                                                                                                                                                                                                                                                                                                                                                                                                                                                                                                                                                                                                                                                                                                                                                                                                                                                                                                                                                                                                                                                                                                                                                                                                                                                                                                                                                                                                                                                                                                                                                                                                                                                                                                                                                                                                                                            |
| 2<br>4 | TITLE-ABS-KEY ( "meta analy*" OR metaanaly* OR meta-analy* )                                                                                                                                                                                                                                                                                                                                                                                                                                                                                                                                                                                                                                                                                                                                                                                                                                                                                                                                                                                                                                                                                                                                                                                                                                                                                                                                                                                                                                                                                                                                                                                                                                                                                                                                                                                                                                                                                                                                                                                                                                                             |
| 2<br>3 | TITLE-ABS-KEY ( ( systematic OR scoping ) W/2 ( review* OR overview* ))                                                                                                                                                                                                                                                                                                                                                                                                                                                                                                                                                                                                                                                                                                                                                                                                                                                                                                                                                                                                                                                                                                                                                                                                                                                                                                                                                                                                                                                                                                                                                                                                                                                                                                                                                                                                                                                                                                                                                                                                                                                  |
| 2<br>2 | TITLE-ABS-KEY ( ( health* OR medical ) W/2 ( personnel OR professional* OR provider* OR worker* OR practitioner* OR aide* ))                                                                                                                                                                                                                                                                                                                                                                                                                                                                                                                                                                                                                                                                                                                                                                                                                                                                                                                                                                                                                                                                                                                                                                                                                                                                                                                                                                                                                                                                                                                                                                                                                                                                                                                                                                                                                                                                                                                                                                                             |
| 2<br>1 | ( TITLE-ABS-KEY ( telehealth OR telemedicine OR telemonitoring )) OR ( TITLE-ABS-KEY ( ( digital OR mobile OR smart ) W/2 health )) OR ( TITLE-ABS-KEY ( "mobile applications" OR internet OR "cell phone" OR "handheld computer*" OR "computer-assisted therapy" )) OR ( TITLE-ABS-KEY ( app OR apps )) OR ( TITLE ( online OR internet OR web* OR digital* OR tele* OR google )) OR ( ABS ( ( online OR internet OR web* OR digital* ) W/2 ( based OR application* OR intervention* OR program* OR therap* ))) OR ( TITLE ( phone* OR telephone* OR smartphone* OR cellphone* OR smartwatch* )) OR ( ABS ( ( phone* OR telephone* OR smartphone* OR cellphone* OR smartwatch* ) W/2 ( based OR application* OR intervention* OR program* OR therap* ))) OR ( TITLE ( "mobile health" OR mhealth OR m-health OR ehealth OR e-health OR emental OR e-mental )) OR ( ABS ( ( "mobile health" OR mhealth OR m-health OR ehealth OR e-health OR emental OR e-mental ) W/2 ( based OR application* OR intervention* OR program* OR therap* ))) OR ( TITLE-ABS-KEY ( mobile* W/2 ( based OR application* OR intervention* OR device* OR technology* ))) OR ( TITLE-ABS-KEY ( "connected devices" OR "smart devices" OR "digital assistant" )) OR ( TITLE-ABS-KEY ( ( health OR medical ) W/2 ( record* OR informati* OR data ))) OR ( TITLE-ABS-KEY ( "digital record*" OR "personalized medicine" OR "personalised medicine" OR interoperability )) OR ( TITLE-ABS-KEY ( ( artificial OR machine OR deep OR hierarchical OR ambient OR comput* ) W/2 ( intelligence OR learning ))) OR ( TITLE-ABS-KEY ( ( computer OR automated ) W/2 reasoning )) OR ( TITLE-ABS-KEY ( knowledge W/2 ( acquisition OR representation* ))) OR ( TITLE-ABS-KEY ( "natural language processing" )) OR ( TITLE-ABS-KEY ( ai OR nlp )) OR ( TITLE-ABS-KEY ( "social media" OR "social network" OR facebook OR twitter OR youtube OR instagram OR flickr OR linkedin OR blog* OR "on-line communit*" OR "online communit*" OR wiki* OR "big data" OR "open data" OR "data mining" OR cloud OR bluetooth OR wearable* OR "wireless technology" )) |

|    |                                                                                                                                                                                                                                                                                                    |
|----|----------------------------------------------------------------------------------------------------------------------------------------------------------------------------------------------------------------------------------------------------------------------------------------------------|
| 20 | TITLE-ABS-KEY ( "social media" OR "social network" OR facebook OR twitter OR youtube OR instagram OR flickr OR linkedin OR blog* OR "on-line communit*" OR "online communit*" OR wiki* OR "big data" OR "open data" OR "data mining" OR cloud OR bluetooth OR wearable* OR "wireless technology" ) |
| 19 | TITLE-ABS-KEY ( ai OR nlp )                                                                                                                                                                                                                                                                        |
| 18 | TITLE-ABS-KEY ( "natural language processing" )                                                                                                                                                                                                                                                    |
| 17 | TITLE-ABS-KEY ( knowledge W/2 ( acquisition OR representation* ) )                                                                                                                                                                                                                                 |
| 16 | TITLE-ABS-KEY ( ( computer OR automated ) W/2 reasoning )                                                                                                                                                                                                                                          |
| 15 | TITLE-ABS-KEY ( ( artificial OR machine OR deep OR hierarchical OR ambient OR comput* ) W/2 ( intelligence OR learning ) )                                                                                                                                                                         |
| 14 | TITLE-ABS-KEY ( "digital record*" OR "personalized medicine" OR "personalised medicine" OR interoperability )                                                                                                                                                                                      |
| 13 | TITLE-ABS-KEY ( ( health OR medical ) W/2 ( record* OR informati* OR data ) )                                                                                                                                                                                                                      |
| 12 | TITLE-ABS-KEY ( "connected devices" OR "smart devices" OR "digital assistant" )                                                                                                                                                                                                                    |
| 11 | TITLE-ABS-KEY ( mobile* W/2 ( based OR application* OR intervention* OR device* OR technolog* ) )                                                                                                                                                                                                  |
| 10 | ABS ( ( "mobile health" OR mhealth OR m-health OR ehealth OR e-health OR emental OR e-mental ) W/2 ( based OR application* OR intervention* OR program* OR therap* ) )                                                                                                                             |
| 9  | TITLE ( "mobile health" OR mhealth OR m-health OR ehealth OR e-health OR emental OR e-mental )                                                                                                                                                                                                     |
| 8  | ABS ( ( phone* OR telephone* OR smartphone* OR cellphone* OR smartwatch* ) W/2 ( based OR application* OR intervention* OR program* OR therap* ) )                                                                                                                                                 |
| 7  | TITLE ( phone* OR telephone* OR smartphone* OR cellphone* OR smartwatch* )                                                                                                                                                                                                                         |
| 6  | ABS ( ( online OR internet OR web* OR digital* ) W/2 ( based OR application* OR intervention* OR program* OR therap* ) )                                                                                                                                                                           |
| 5  | TITLE ( online OR internet OR web* OR digital* OR tele* OR google )                                                                                                                                                                                                                                |
| 4  | TITLE-ABS-KEY ( app OR apps )                                                                                                                                                                                                                                                                      |
| 3  | TITLE-ABS-KEY ( "mobile applications" OR internet OR "cell phone" OR "handheld computer*" OR "computer-assisted therapy" )                                                                                                                                                                         |
| 2  | TITLE-ABS-KEY ( ( digital OR mobile OR smart ) W/2 health )                                                                                                                                                                                                                                        |
| 1  | TITLE-ABS-KEY ( telehealth OR telemedicine OR telemonitoring )                                                                                                                                                                                                                                     |

Number of results from the first search in Scopus: 3820  
Number of results from the updated search in Scopus: 952  
Total number of results from Scopus 4772

## Epistemonikos

Note to the database:

The database does not support proximity operators, controlled vocabulary (e.g. MeSH terms) and there is a limitation to the length of the search. Adjustments has been made to the search. In the update, the search was split up in two parts due to the length of the URL generated when searching in Epistemonikos.

Number of results from the first search in Epistemonikos: 2622  
Number of results from the updated search in Epistemonikos: 793  
Total number of results from Epistemonikos 3415

(title:(("digital" OR tele\* OR "mhealth" OR "m-health" OR "ehealth" OR "e-health" OR "emental" OR "e-mental" OR "internet" OR "mobile phone" OR "computer assisted therapy" OR "connected devices" OR "smart devices" OR "online" OR web\* OR "google" OR phone\* OR smartphone\* OR cellphone\* OR smartwatch\* OR "mobile health" OR "smart health" OR "mobile based" OR "mobile application" OR "mobile applications" OR "mobile intervention" OR "mobile interventions" OR "mobile device" OR "mobile devices" OR "mobile technology" OR "mobile technologies" OR "app" OR "apps" OR "social media" OR "social network" OR "Facebook" OR "twitter" OR "youtube" OR "Instagram" OR "flickr" OR "Linkedin" OR blog\* OR "on-line community" OR "on-line communities" OR "online community" OR "online communities" OR wiki\* OR "big data" OR "open data" OR "data mining" OR cloud OR bluetooth OR wearable\* OR "wireless technology" OR "health record" OR "health records" OR "medical record" OR "medical records" OR "health information" OR "medical information" OR "health data" OR "medical data" OR "personalized medicine" OR "interoperability" OR "natural language processing" OR "AI" OR "NLP" OR "artificial intelligence" OR "machine intelligence" OR "deep intelligence" OR "hierarchical intelligence" OR "ambient intelligence" OR "computer intelligence" OR "artificial learning" OR "machine learning" OR "deep learning" OR "hierarchical learning" OR "ambient learning" OR "computer learning" OR "computer reasoning" OR "automated reasoning" OR "knowledge acquisition" OR "knowledge representation" OR "knowledge representations") OR abstract:(("digital" OR tele\* OR "mhealth" OR "m-health" OR "ehealth" OR "e-health" OR "emental" OR "e-mental" OR "internet" OR "mobile phone" OR "computer assisted therapy" OR "connected devices" OR "smart devices" OR "online" OR web\* OR "google" OR phone\* OR smartphone\* OR cellphone\* OR smartwatch\* OR "mobile health" OR "smart health" OR "mobile based" OR "mobile application" OR "mobile applications" OR "mobile intervention" OR "mobile interventions" OR "mobile device" OR "mobile devices" OR "mobile technology" OR "mobile technologies" OR "app" OR "apps" OR "social media" OR "social network" OR "Facebook" OR "twitter" OR "youtube" OR "Instagram" OR "flickr" OR "Linkedin" OR blog\* OR "on-line community" OR "on-line communities" OR "online community" OR "online communities" OR wiki\* OR "big

data" OR "open data" OR "data mining" OR cloud OR bluetooth OR wearable\* OR "wireless technology" OR "health record" OR "health records" OR "medical record" OR "medical records" OR "health information" OR "medical information" OR "health data" OR "medical data" OR "personalized medicine" OR "interoperability" OR "natural language processing" OR "AI" OR "NLP" OR "artificial intelligence" OR "machine intelligence" OR "deep intelligence" OR "hierarchical intelligence" OR "ambient intelligence" OR "computer intelligence" OR "artificial learning" OR "machine learning" OR "deep learning" OR "hierarchical learning" OR "ambient learning" OR "computer learning" OR "computer reasoning" OR "automated reasoning" OR "knowledge acquisition" OR "knowledge representation" OR "knowledge representations")) AND (title:(("health personnel" OR "healthcare personnel" OR "health professional" OR "health professionals" OR "healthcare professional" OR "healthcare professionals" OR "health provider" OR "health providers" OR "healthcare provider" OR "healthcare providers" OR "health worker" OR "health workers" OR "healthcare worker" OR "healthcare workers" OR "health practitioner" OR "health practitioners" OR "healthcare practitioner" OR "healthcare practitioners" OR "health aide" OR "health aides" OR "healthcare aide" OR "healthcare aides" OR "medical personnel" OR "medical professional" OR "medical professionals" OR "medical provider" OR "medical providers" OR "medical worker" OR "medical workers" OR "medical practitioner" OR "medical practitioners" OR "medical aide" OR "medical aides")) OR abstract:(("health personnel" OR "healthcare personnel" OR "health professional" OR "health professionals" OR "healthcare professional" OR "healthcare professionals" OR "health provider" OR "health providers" OR "healthcare provider" OR "healthcare providers" OR "health worker" OR "health workers" OR "healthcare worker" OR "healthcare workers" OR "health practitioner" OR "health practitioners" OR "healthcare practitioner" OR "healthcare practitioners" OR "health aide" OR "health aides" OR "healthcare aide" OR "healthcare aides" OR "medical personnel" OR "medical professional" OR "medical professionals" OR "medical provider" OR "medical providers" OR "medical worker" OR "medical workers" OR "medical practitioner" OR "medical practitioners" OR "medical aide" OR "medical aides")) AND (title:((((systematic OR scoping) AND (review\* OR overview\*)) OR ((meta analy\*) OR metaanaly\* OR meta-analy\*)) OR abstract:((((systematic OR scoping) AND (review\* OR overview\*)) OR ((meta analy\*) OR metaanaly\* OR meta-analy\*)))
